# Supplementary material
Source: PubMed Central journal article supplement (PMC34676)
Supplement: pnas_131568198_1.pdf [file pnas_131568198_1.pdf]

Table 1. Gene characteristics and dN/dS ratios of *Drosophila simulans* accessory gland ESTs

| Acc. #   | EST  | dN     | dS    | dN/dS | -2DI  | arm | Map     | dbEST (Gene) | Function                            | CG #    | AG En. | #AAs | S. Seq. | hits |
|----------|------|--------|-------|-------|-------|-----|---------|--------------|-------------------------------------|---------|--------|------|---------|------|
| BG642142 | 02   | NC     | NC    | -     | -     | 3R  | 82D6    | YES          | translation factor                  | CG9769  | NO     | 280  | NO      | 1    |
| BG642151 | 03   | NC     | NC    | -     | -     | X   | 16F     | YES          | ?                                   | NONE    | NO     | ?    | NO      | 1    |
| BG642154 | 04   | 0.0404 | 0.153 | 0.264 | 11.64 | X   | 18B7    | YES          | ?                                   | CG7889  | NO     | 319  | NO      | 1    |
| BG642155 | 05   | 0.0414 | 0.165 | 0.251 | 5.6   | 3R  | 96F3    | YES          | (MST57DA)                           | CG9074  | YES    | 75   | YES     | 17   |
| BG642156 | 06   | 0.2073 | 0.271 | 0.764 | 0.34  | 2L  | 31F     | YES          | lipase/esterase                     | CG17093 | YES    | 731  | NO      | 6    |
| BG642157 | 07   | 0.03   | 0.081 | 0.372 | 1.864 | 2L  | 28-29   | YES          | serpin protease inhib.              | CG8137  | YES    | 306  | YES     | 2    |
| BG642158 | 08   | NC     | NC    | -     | -     | 2R  | 60B2    | YES          | (eif-5A) translation factor         | CG3186  | YES    | 159  | NO      | 1    |
| BG642159 | 09   | 0.0469 | 0.023 | 2.039 | 0.444 | 2R  | 43A4    | NO           | ?                                   | CG12827 | NO     | 99   | NO      | 1    |
| BG642132 | 10   | ?      | ?     | -     | -     | X   | 3C-E    | NO           | no good prediction, AE003427        | NONE    | NO     | ?    | ?       | 1    |
| BG642133 | 11   | 0.0195 | 0.26  | 0.075 | 33.71 | 2L  | 31F5    | YES          | ?                                   | CG18284 | NO     | 356  | NO      | 2    |
| BG642134 | 12   | 0.0148 | 0.098 | 0.151 | 6.408 | X   | 9E2     | YES          | ?                                   | CG1534  | YES    | 121  | NO      | 1    |
| BG642135 | 13   | ?      | ?     | -     | -     | 2L  | 40B-40D | NO           | no good prediction                  | NONE    | NO     | ?    | ?       | 1    |
| BG642137 | 14   | 0.0212 | 0.134 | 0.158 | 33.64 | 3R  | 84C1    | YES          | ?                                   | CG1965  | NO     | 365  | NO      | 1    |
| BG642136 | 15   | 0.1349 | 0.066 | 2.05  | 3.012 | 3L  | 67B-C   | YES          | ?                                   | CG16707 | YES    | 183  | YES     | 1    |
| BG642138 | 16   | 0.0938 | 0.047 | 1.996 | 20.42 | 2L  | 31F5    | YES          | esterase/lipase                     | CG17101 | YES    | 355  | NO      | 9    |
| BG642139 | 17   | NC     | NC    | -     | -     | 3R  | 94C-D   | NO           | ?                                   | NONE    | NO     | ?    | ?       | 1    |
| BG642140 | 18   | 0.0037 | 0.232 | 0.016 | 27.43 | 3R  | 99D5    | YES          | (Sry-delta)                         | CG17958 | YES    | 433  | NO      | 1    |
| BG642141 | 19   | 0.0001 | 0.121 | 8E-04 | 35.27 | 2R  | 48E2    | YES          | cell cycle regulator                | CG8889  | NO     | 323  | NO      | 1    |
| BG642160 | 1a11 | ?      | ?     | -     | -     | 2R  | 60D     | NO           | no good prediction AE003464         | NONE    | NO     | ?    | ?       | 1    |
| BG642161 | 1a12 | 0.0043 | 0.069 | 0.062 | 9.364 | 2R  | 59F7    | YES          | ?                                   | CG5532  | NO     | 112  | NO      | 1    |
| BG642162 | 1a2  | 0.0295 | 0.05  | 0.592 | 0.762 | 2L  | 26A5    | NO           | (DSF) hormone receptor              | CG9019  | NO     | 691  | NO      | 1    |
| BG642163 | 1a3  | 0.0784 | 0.05  | 1.559 | 0.176 | 2L  | 25A3    | NO           | ?                                   | CG11933 | YES    | 91   | NO      | 1    |
| BG642164 | 1a4  | 0.1057 | 0.075 | 1.413 | 0.82  | 2L  | 32A     | NO           | ?                                   | NONE    | YES    | 1087 | YES     | 4    |
| BG642165 | 1a5  | ?      | ?     | -     | -     | 3L  | 65A     | NO           | no good prediction AE003563         | NONE    | NO     | ?    | ?       | 1    |
| BG642166 | 1a6  | 0.0469 | 0.033 | 1.421 | 0.39  | 3L  | 71B8    | YES          | transporter                         | CG7255  | NO     | 880  | NO      | 1    |
| BG642167 | 1a8  | 0.1784 | 0.084 | 2.121 | 1.028 | 3   | 96F     | NO           | ?                                   | NONE    | YES    | 50   | YES     | 1    |
| BG642169 | 1b12 | 0.0001 | 0.142 | 7E-04 | 24.28 | 3L  | 74D2    | YES          | ubiquitin ligase                    | CG7555  | NO     | 1082 | NO      | 1    |
| BG642170 | 1b5  | 0.0114 | 0.064 | 0.18  | 2.026 | 3R  | 96F3    | YES          | (Mst57Da)                           | CG9074  | YES    | 75   | YES     | 17   |
| BG642172 | 1B8  | NC     | NC    | -     | -     | 2R  | 43B-C   | NO           | ?                                   | NONE    | NO     | 479  | NO      | 1    |
| BG642173 | 1c1  | 0.003  | 0.151 | 0.02  | 25.5  | 2L  | 31F5    | YES          | esterase/lipase                     | CG17097 | YES    | 318  | NO      | 8    |
| BG642174 | 1c10 | 0.0079 | 0.141 | 0.056 | 14.87 | 2L  | 31F5    | YES          | lipase                              | CG17097 | YES    | 318  | NO      | 8    |
| BG642175 | 1c11 | 0.0026 | 0.134 | 0.019 | 15.12 | 3L  | 62A7    | YES          | cholinephosphate cytidyltransferase | CG18330 | NO     | 381  | NO      | 1    |
| BG642176 | 1C12 | NC     | NC    | -     | -     | X   | 2A      | YES          | (EG:8D8.6) Acetyltransf             | CG11412 | NO     | 402  | NO      | 1    |
| BG642177 | 1c3  | 0.0001 | 0.057 | 0.002 | 2.056 | 3L  | 67D     | YES          | cell adhesion                       | CG6590  | NO     | 1045 | NO      | 1    |
| BG642178 | 1c4  | 0.0589 | 0.137 | 0.431 | 6.356 | 2L  | 28E     | YES          | ligand binding/carrier              | CG8552  | NO     | 2016 | NO      | 1    |
| BG642180 | 1c5  | 0.006  | 0.149 | 0.04  | 12.99 | 3L  | 75D     | NO           | ?                                   | CG18231 | NO     | 391  | NO      | 2    |

|          |      |        |       |       |       |    |          |                                |         |     |      |     |    |
|----------|------|--------|-------|-------|-------|----|----------|--------------------------------|---------|-----|------|-----|----|
| BG642179 | 1c6  | 0.0383 | 0.2   | 0.191 | 7.378 | 3R | 95E8     | NO (Acp95EF )                  | NONE    | YES | 52   | YES | 2  |
| BG642181 | 1c8  | 0.051  | 0.199 | 0.256 | 2.628 | 3R | 92E      | YES (ELONGIN-B)                | CG4202  | NO  | 118  | NO  | 1  |
| BG642182 | 1C9  | NC     | NC    | -     | -     | 2R | 50E8     | YES kinase                     | CG8485  | NO  | 860  | NO  | 1  |
| BG642183 | 1D1  | NC     | NC    | -     | -     | 2R | 47C1     | NO (BCDNA:LD26050) FN3         | CG12340 | NO  | 1420 | NO  | 1  |
| BG642184 | 1D10 | NC     | NC    | -     | -     | X  | 8B       | YES (MOE) actin binding        | CG10701 | NO  | 512  | YES | 1  |
| BG642185 | 1d11 | 0.003  | 0.093 | 0.032 | 23.21 | 3R | 100A1    | YES transporter                | CG9702  | NO  | 676  | NO  | 1  |
| BG642186 | 1d12 | 0.0047 | 0.071 | 0.066 | 15.61 | 2R | 48f1     | YES (Cct5) chaperone           | CG8439  | NO  | 542  | NO  | 1  |
| BG642187 | 1D2  | NC     | NC    | -     | -     | X  | 6E4      | YES (OGRE) ion channel         | CG3039  | NO  | 362  | YES | 1  |
| BG642188 | 1d3  | NC     | NC    | -     | -     | 2L | 25D      | NO ?                           | NONE    | NO  | 41   | NO  | 1  |
| BG642189 | 1D6  | NC     | NC    | -     | -     | X  | 14A1     | YES (EXD) transcription factor | CG8933  | NO  | 376  | NO  | 2  |
| BG642190 | 1d7  | 0.0232 | 0.106 | 0.218 | 7.298 | 2L | 25C10    | NO enzyme-lipase               | CG14034 | YES | 223  | NO  | 3  |
| BG642191 | 1D8  | NC     | NC    | -     | -     | 2R | 45D5     | YES (PDK) kinase               | CG8808  | NO  | 413  | NO  | 1  |
| BG642192 | 1e11 | 0.0496 | 0.142 | 0.349 | 5.662 | 2  | 32A      | NO ?                           | NONE    | YES | 1087 | YES | 4  |
| BG642193 | 1e12 | 0.0089 | 0.237 | 0.038 | 27.96 | 2L | 31F5     | YES lipase                     | CG17101 | YES | 355  | NO  | 9  |
| BG642194 | 1e3  | NC     | NC    | -     | -     | 2L | 26A-B    | NO Kr-h no ecdysone response   | NONE    | NO  | 721  | NO  | 1  |
| BG642195 | 1e4  | 0.0076 | 0.076 | 0.1   | 7.012 | 2R | 54C9     | YES endopeptidase              | CG4847  | YES | 390  | YES | 1  |
| BG642196 | 1e5  | 0      | 0     | 0     | 0     | 3L | 69C      | YES (eIF-2beta)                | CG4153  | NO  | 312  | NO  | 1  |
| BG642197 | 1E9  | NC     | NC    | -     | -     | 3L | 70B      | YES proline rich               | CG10741 | NO  | 535  | NO  | 1  |
| BG642198 | 1f12 | 0.0141 | 0.045 | 0.315 | 2.518 | 2L | 62A11    | YES RPL23A) ribosomal protein  | CG7977  | NO  | 277  | NO  | 1  |
| BG642199 | 1f2  | 0.0095 | 0.091 | 0.104 | 14.06 | 3R | 87A      | YES (mfas )                    | CG3359  | NO  | 816  | YES | 4  |
| BG642200 | 1f3  | 0.0143 | 0.103 | 0.139 | 2.628 | 2R | 56D-E    | NO ?                           | NONE    | NO  | 635  | NO  | 1  |
| BG642201 | 1f5  | 0.0026 | 0.162 | 0.016 | 44.69 | 3L | 79E2     | YES (Hem)                      | CG5837  | NO  | 1126 | NO  | 1  |
| BG642203 | 1g10 | 0.0095 | 0.108 | 0.088 | 9.37  | 2L | 31F5     | NO lipase                      | CG17097 | YES | 318  | NO  | 8  |
| BG642204 | 1g11 | 0.0002 | 0.195 | 0.001 | 9.166 | 2R | 49D1     | NO ?                           | CG17575 | NO  | 291  | YES | 2  |
| BG642205 | 1g12 | ?      | ?     | -     | -     | X  | 19e      | NO no good prediction          | NONE    | NO  | ?    | ?   | 1  |
| BG642206 | 1g2  | 0.0053 | 0.111 | 0.048 | 26.52 | 3R | 0E6-90F1 | YES (BcDNA:GH04120)            | CG7985  | NO  | 752  | NO  | 1  |
| BG642207 | 1g4  | 0.0571 | 0.059 | 0.969 | 0.002 | X  | 4A2      | YES ?                          | CG6450  | NO  | 2799 | NO  | 1  |
| BG642208 | 1g6  | 0.0153 | 0.041 | 0.372 | 0.428 | 3R | 96F3     | YES (Mst57Da)                  | CG9074  | YES | 75   | YES | 17 |
| BG642209 | 1h3  | 0.0141 | 0.15  | 0.094 | 17.33 | 3L | 76B      | YES (Taf60)                    | CG9348  | NO  | 592  | NO  | 1  |
| BG642210 | 1h5  | 0.0533 | 0.063 | 0.847 | 0.086 | 2R | 46B10    | YES ligand binding/carrier     | CG1652  | NO  | 322  | YES | 1  |
| BG642211 | 1H7  | ?      | ?     | -     | -     | X  | 19E      | NO no good prediction          | NONE    | NO  | ?    | ?   | 1  |
| BG642143 | 20   | NC     | NC    | -     | -     | 3R | 93F      | NO ecdysone response RNA       | NONE    | NO  | -    | NO  | 1  |
| BG642144 | 21   | 0.1634 | 0.226 | 0.724 | 0.986 | 2L | 38E9     | YES serpin protease inhib.     | CG9334  | NO  | 341  | NO  | 1  |
| BG642145 | 22   | 0.0258 | 0.138 | 0.188 | 19.04 | 2L | 38F4     | YES DNA repair/nuclease        | CG9272  | NO  | 308  | NO  | 1  |
| BG642146 | 23   | NC     | NC    | -     | -     | 3L | 64B      | YES ?                          | CG11357 | NO  | 401  | NO  | 1  |
| BG642147 | 24   | 0.003  | 0.15  | 0.02  | 34.51 | 3L | 66A22    | YES (RNaseX25)                 | CG8194  | NO  | 325  | YES | 1  |
| BG642212 | 25   | NC     | NC    | -     | -     | 3L | 62       | NO ?                           | NONE    | NO  | ?    | ?   | 1  |
| BG642148 | 27   | 0.038  | 0.142 | 0.267 | 9.772 | 3L | 66E1     | NO ?                           | CG13309 | NO  | 175  | YES | 1  |

|          |      |        |       |       |       |    |         |                                         |         |     |      |     |    |
|----------|------|--------|-------|-------|-------|----|---------|-----------------------------------------|---------|-----|------|-----|----|
| BG642149 | 28   | 0.0038 | 0.039 | 0.099 | 4.712 | 2R | 60B2    | YES ribosomal protein                   | CG3195  | NO  | 165  | NO  | 1  |
| BG642150 | 29   | 0.0199 | 0.117 | 0.17  | 9.812 | 3L | 36F6    | YES (ACP36DE)                           | CG7157  | YES | 912  | YES | 4  |
| BG642213 | 2a10 | 0.0568 | 0.178 | 0.32  | 4.762 | 3R | 96F3    | YES (Mst57Da)                           | CG9074  | YES | 75   | YES | 17 |
| BG642215 | 2a6  | 0.0001 | 0.147 | 7E-04 | 25.52 | 2  | 36C-36D | YES ?                                   | NONE    | NO  | 1263 | NO  | 1  |
| BG642216 | 2a7  | 0.0214 | 0.092 | 0.234 | 2.666 | 3L | 68B3    | NO ?                                    | CG6168  | NO  | 205  | NO  | 3  |
| BG642217 | 2a9  | 0.004  | 0.384 | 0.01  | 35.66 | 2L | 31F     | YES enzyme lipase/esterase              | CG17097 | YES | 318  | NO  | 8  |
| BG642218 | 2b10 | 0.0029 | 0.197 | 0.015 | 40.56 | 2R | 47E5    | YES (FPPS_farnesyl pyrophosphate syn.   | CG12389 | NO  | 419  | NO  | 1  |
| BG642219 | 2b11 | 0.0743 | 0.094 | 0.791 | 0.216 | 2  | 32A     | NO ?                                    | NONE    | YES | 1087 | YES | 4  |
| BG642220 | 2b7  | 0.0502 | 0.141 | 0.355 | 4.942 | 3L | 68B3    | NO ?                                    | CG6168  | NO  | 205  | NO  | 3  |
| BG642221 | 2c12 | 0.0175 | 2E-04 | 87.5  | 0.796 | X  | 15A3    | YES (if) cell adhesion                  | CG9623  | NO  | 1396 | YES | 1  |
| BG642222 | 2c3  | 0.0074 | 0.13  | 0.057 | 14.18 | X  | 3B6     | YES (EG:95B7.3)                         | CG2713  | NO  | 415  | NO  | 1  |
| BG642223 | 2c4  | ?      | ?     | -     | -     | 3R | 100C    | NO no good prediction                   | NONE    | NO  | ?    | ?   | 1  |
| BG642224 | 2c6  | 0.0223 | 0.167 | 0.134 | 21.78 | 3R | 94D12   | YES dehydrogenase/reductase             | CG17121 | NO  | 361  | NO  | 1  |
| BG642225 | 2d10 | 0.0256 | 0.126 | 0.203 | 5.326 | 2L | 33A2    | YES ?                                   | CG6488  | NO  | 570  | NO  | 1  |
| BG642226 | 2d11 | 0.0107 | 0.039 | 0.278 | 0.76  | 3L | 68C     | NO ?                                    | NONE    | NO  | 172  | NO  | 1  |
| BG642227 | 2d12 | 0.011  | 0.213 | 0.052 | 30.87 | 3L | 77E6    | YES hydroxyacylglutathione hydrolase    | CG4365  | NO  | 348  | NO  | 1  |
| BG642228 | 2d7  | 0.0277 | 0.162 | 0.171 | 2.38  | 3L | 68B3    | NO ?                                    | CG6168  | NO  | 205  | NO  | 3  |
| BG642229 | 2d8  | NC     | NC    | -     | -     | 2r | 50      | YES ?                                   | NONE    | NO  | 1835 | YES | 1  |
| BG642230 | 2e10 | 0.0413 | 0.09  | 0.458 | 2.1   | 3R | 98E2    | NO ?                                    | CG9997  | NO  | 330  | YES | 1  |
| BG642231 | 2e12 | 0.0256 | 0.099 | 0.26  | 3.144 | 2L | 34B7    | YES ?                                   | CG7110  | NO  | 740  | NO  | 1  |
| BG642232 | 2e2  | 0.0284 | 0.015 | 1.856 | 0.346 | 3R | 83E6    | YES trypsin inhibitor                   | CG10284 | NO  | 547  | YES | 1  |
| BG642233 | 2e4  | 0.0483 | 0.2   | 0.242 | 5.932 | 3R | 95E8    | NO (Acp95EF )                           | NONE    | YES | 52   | YES | 2  |
| BG642234 | 2F1  | NC     | NC    | -     | -     | 3R | 93B     | YES (RAB11)                             | CG5771  | NO  | 214  | NO  | 1  |
| BG642235 | 2f11 | 0.0003 | 0.272 | 0.001 | 55.19 | 3R | 94B6    | YES ?                                   | CG6921  | NO  | 322  | NO  | 1  |
| BG642236 | 2f12 | 0.0229 | 0.159 | 0.144 | 5.818 | 3L | 79C3    | NO (msopa) male-specific opa containing | CG14560 | NO  | 83   | YES | 1  |
| BG642237 | 2f3  | 0.0253 | 0.118 | 0.215 | 7.088 | 2L | 36F6    | YES (ACP36DE)                           | CG7157  | YES | 912  | YES | 4  |
| BG642238 | 2f4  | 0.0051 | 0.111 | 0.046 | 9.764 | 3L | 64A10   | YES (RFC40)                             | CG14999 | NO  | 331  | NO  | 1  |
| BG642239 | 2f9  | 0.0228 | 2E-04 | 114   | 1.264 | 3L | 67A-B   | YES ?                                   | NONE    | NO  | 348  | NO  | 1  |
| BG642240 | 2g2  | 0.0144 | 0.134 | 0.107 | 15.99 | 2L | 36A7    | YES endopeptidase                       | CG17331 | YES | 201  | NO  | 1  |
| BG642241 | 2g4  | 0.0671 | 0.071 | 0.941 | 0.012 | 2L | 26A5    | YES ?                                   | CG9029  | NO  | 116  | YES | 3  |
| BG642242 | 2h1  | 0.0103 | 0.109 | 0.094 | 16.33 | X  | 17B4    | YES glutamyltranspeptidase              | CG6461  | NO  | 561  | NO  | 1  |
| BG642243 | 2h10 | 0.0115 | 0.076 | 0.151 | 2.4   | 3R | 96F3    | YES (Mst57Da)                           | CG9074  | YES | 75   | YES | 17 |
| BG642244 | 2h3  | 0.0528 | 0.046 | 1.145 | 0.014 | 2L | 32D1    | NO (ACP32CD)                            | CG4605  | YES | 249  | YES | 3  |
| BG642245 | 2h4  | 0.057  | 0.199 | 0.286 | 4.52  | 3L | 62A2    | NO ?                                    | CG9168  | NO  | 574  | NO  | 1  |
| BG642247 | 2h7  | 0.026  | 0.157 | 0.165 | 10.27 | X  | 1C4     | NO endopeptidase                        | CG11664 | NO  | 254  | YES | 1  |
| BG642248 | 2h8  | 0.0144 | 0.087 | 0.166 | 13.1  | 3R | 93D1    | YES NLS_BP, PCI_DOMAIN                  | CG5862  | NO  | 309  | NO  | 1  |
| BG642152 | 30   | 0.0001 | 0.105 | 9E-04 | 20.04 | 2L | 31E1    | YES (KdelR ) ER-lumen retain            | CG5183  | NO  | 212  | YES | 1  |
| BG642153 | 32   | 0.0002 | 0.196 | 0.001 | 39.93 | 2R | 57C     | YES (mago)                              | CG9401  | NO  | 147  | NO  | 1  |

|          |      |        |       |       |       |    |        |                                         |         |     |      |     |    |
|----------|------|--------|-------|-------|-------|----|--------|-----------------------------------------|---------|-----|------|-----|----|
| BG642249 | 3a1  | 0.0138 | 0.151 | 0.091 | 15.08 | 3R | 89B2   | YES ?                                   | CG5516  | NO  | 176  | NO  | 1  |
| BG642250 | 3a11 | 0.0002 | 0.153 | 0.001 | 5.512 | 2L | 31F5   | YES esterase/lipase                     | CG17101 | YES | 355  | NO  | 9  |
| BG642251 | 3a3  | 0.0609 | 6E-04 | 101.5 | 4.38  | 2L | 26F    | NO ?                                    | NONE    | NO  | 53   | YES | 1  |
| BG642252 | 3a4  | 0.0001 | 0.052 | 0.002 | 5.85  | 2L | 27F6   | YES ?                                   | CG5177  | NO  | 276  | NO  | 1  |
| BG642253 | 3a5  | 0.0546 | 0.173 | 0.316 | 4.918 | 3R | 96F3   | YES (Mst57Da)                           | CG9074  | YES | 75   | YES | 17 |
| BG642254 | 3a6  | 0.0142 | 0.04  | 0.356 | 0.468 | 3R | 96F3   | YES (Mst57Da)                           | CG9074  | YES | 75   | YES | 17 |
| BG642255 | 3a8  | 0.0619 | 0.119 | 0.519 | 1.51  | X  | 12B9   | YES (BcDNALD21129) structural           | cg11092 | NO  | 823  | NO  | 1  |
| BG642256 | 3b3  | 0.0137 | 0.233 | 0.059 | 41.35 | 3L | 77C4   | YES transporter/dehydratase             | CG17637 | NO  | 504  | NO  | 1  |
| BG642257 | 3b5  | 0.0491 | 0.119 | 0.412 | 3.196 | 2R | 54A1   | NO serpin                               | CG10956 | NO  | 303  | NO  | 1  |
| BG642258 | 3B8  | 0.0075 | 0.045 | 0.166 | 5.308 | 2R | 41E3   | YES ?                                   | CG8426  | NO  | 948  | NO  | 1  |
| BG642259 | 3c1  | 0.0772 | 0.177 | 0.436 | 4.87  | 2L | 31F    | NO ?                                    | NONE    | YES | 1087 | YES | 1  |
| BG642260 | 3c4  | 0.007  | 0.19  | 0.037 | 28.52 | 3R | 98F6   | YES kinase                              | CG1951  | YES | 835  | NO  | 1  |
| BG642261 | 3c8  | 0.0232 | 0.071 | 0.325 | 0.562 | 2L | 31F4   | YES enzyme lipase/esterase              | CG17093 | YES | 731  | NO  | 6  |
| BG642262 | 3d11 | 0.0614 | 0.094 | 0.65  | 0.654 | 3L | 77B4   | YES serpin                              | CG6289  | YES | 94   | YES | 2  |
| BG642263 | 3d3  | 0      | 0     | -     | 0     | 3R | 98D5   | NO ?                                    | CG9988  | NO  | 598  | NO  | 1  |
| BG642264 | 3d6  | 0.0863 | 0.142 | 0.607 | 0.496 | X  | 3A7    | YES N-acetyltransferase                 | CG13759 | NO  | 205  | NO  | 2  |
| BG642264 | 3d6  | 0.0367 | 0.109 | 0.338 | 0.65  | X  | 3A7    | YES N-acetyltransferase                 | CG13759 | NO  | 205  | NO  | 2  |
| BG642265 | 3d7  | 0.0645 | 0.056 | 1.162 | 0.03  | 2L | 28-29  | YES serpin                              | CG8137  | YES | 306  | YES | 2  |
| BG642266 | 3e1  | 0.0233 | 0.162 | 0.144 | 14.29 | 3L | 65F3   | YES (SRP19) signal recognition particle | CG4457  | NO  | 160  | NO  | 3  |
| BG642267 | 3e4  | 0.0111 | 0.128 | 0.087 | 23.56 | X  | 7C7    | YES vesicle docking protein             | CG1422  | NO  | 815  | NO  | 1  |
| BG642268 | 3e6  | 0.1072 | 0.044 | 2.436 | 0.614 | 2L | 31F4   | YES esterase/lipase                     | CG17093 | YES | 654  | NO  | 6  |
| BG642269 | 3e9  | 0      | 0.04  | 0     | 2.384 | 3L | 72B1   | YES (PKA-C3) kinase                     | CG6117) | NO  | 233  | NO  | 1  |
| BG642270 | 3f1  | 0.0106 | 0.133 | 0.079 | 20.28 | 2R | 51E8   | NO lipase                               | CG8093  | NO  | 398  | YES | 1  |
| BG642271 | 3f7  | ?      | ?     | -     | -     | 3R | 89AB   | NO no good prediction                   | NONE    | NO  | ?    | ?   | 1  |
| BG642272 | 3g11 | ?      | ?     | -     | -     | 2L | 38A    | NO no good prediction AE003665          | NONE    | NO  | ?    | ?   | 2  |
| BG642273 | 3g3  | 0.0339 | 0.201 | 0.168 | 14.5  | ?  | UNKOWN | YES RNA binding                         | CG17540 | NO  | 384  | NO  | 1  |
| BG642274 | 3g6  | 0.0232 | 0.106 | 0.218 | 5.156 | 3R | 96F3   | YES (Mst57Da)                           | CG9074  | YES | 75   | YES | 17 |
| BG642276 | 3H5  | NC     | NC    | -     | -     | 2L | 26A    | NO ?                                    | CG9029  | NO  | 116  | YES | 3  |
| BG642277 | 3h7  | 0.0091 | 0.09  | 0.101 | 8.862 | X  | 19f2   | YES (BBX) BOBBY SOX                     | CG1414  | NO  | 769  | NO  | 1  |
| BG642278 | 3h8  | 0.033  | 0.171 | 0.193 | 2.292 | X  | 19C1   | YES (ANNX) actin binding                | CG9579  | NO  | 320  | NO  | 1  |
| BG642279 | 4a10 | 0.0281 | 0.144 | 0.195 | 5.34  | X  | 10B14  | YES diacylglycerol kinase               | CG1747  | NO  | 641  | NO  | 1  |
| BG642280 | 4a11 | 0.0568 | 0.178 | 0.32  | 4.762 | 3R | 96F3   | YES (Mst57Da)                           | CG9074  | YES | 75   | YES | 17 |
| BG642281 | 4a5  | 0.0175 | 0.017 | 1.023 | 0.002 | 2L | 31F    | YES enzyme lipase/esterase              | CG17097 | YES | 318  | NO  | 8  |
| BG642282 | 4a6  | 0      | 0     | -     | 0     | 3R | 94A    | YES ?                                   | CG5382  | NO  | 299  | NO  | 1  |
| BG642283 | 4a8  | 0.0001 | 0.079 | 0.001 | 21.71 | 3R | 89B3   | YES (HEL89B) DNA binding                | CG4261  | NO  | 1861 | NO  | 1  |
| BG642284 | 4a9  | 0.0197 | 0.48  | 0.041 | 17.49 | 3L | 75D1   | YES ?                                   | CG18231 | NO  | 374  | NO  | 2  |
| BG642285 | 4b1  | 0.02   | 0.145 | 0.138 | 4.952 | 2L | 21C5   | YES ?                                   | CG11840 | NO  | 389  | NO  | 1  |
| BG642286 | 4b11 | 0.0003 | 0.291 | 0.001 | 31.63 | X  | 11E6   | YES antioxidant enzyme                  | CG1633  | NO  | 194  | NO  | 1  |

|          |      |        |       |       |       |    |       |                                         |         |     |      |     |    |
|----------|------|--------|-------|-------|-------|----|-------|-----------------------------------------|---------|-----|------|-----|----|
| BG642287 | 4b3  | 0.0114 | 0.122 | 0.093 | 19.54 | 3R | 97A4  | YES endopeptidase                       | CG6069  | NO  | 483  | YES | 1  |
| BG642288 | 4b5  | 0.0965 | 0.086 | 1.125 | 0.008 | 2L | 31F5  | YES enzyme lipase/esterase              | CG17097 | YES | 318  | NO  | 8  |
| BG642289 | 4b9  | ?      | ?     | -     | -     | 2R | 51B   | NO no good prediction AE003812          | NONE    | NO  | ?    | ?   | 1  |
| BG642290 | 4c11 | 0.0275 | 0.124 | 0.222 | 5.528 | X  | 7C9   | YES ?                                   | CG2206  | NO  | 854  | YES | 1  |
| BG642291 | 4c4  | 0.0078 | 0.203 | 0.038 | 32.32 | 2R | 59C3  | YES [L(2)K09913]                        | CG3082  | NO  | 389  | NO  | 1  |
| BG642292 | 4c9  | 0.0001 | 0.058 | 0.002 | 10.27 | 2L | 21C2  | YES (RPP2) ribosomal                    | CG4087  | NO  | 112  | NO  | 1  |
| BG642293 | 4d10 | 0.0001 | 0.067 | 0.001 | 2.254 | 3R | 89B   | NO ?                                    | CG14879 | NO  | 178  | NO  | 1  |
| BG642294 | 4d11 | 0.0499 | 0.033 | 1.503 | 0.134 | 2R | 55B7  | YES ?                                   | CG16803 | NO  | 42   | NO  | 2  |
| BG642295 | 4d7  | 0.0114 | 0.076 | 0.151 | 5.432 | 3R | 93F10 | YES thioredoxin                         | CG17843 | NO  | 552  | YES | 2  |
| BG642296 | 4d9  | 0.0322 | 0.144 | 0.224 | 5.53  | 2L | 26A5  | NO (ACP26Ab)                            | CG9024  | YES | 90   | YES | 1  |
| BG642297 | 4e1  | 0.007  | 0.017 | 0.412 | 0.362 | 2R | 55C   | YES ?                                   | CG5544  | NO  | 404  | NO  | 2  |
| BG642298 | 4e10 | 0.0149 | 0.071 | 0.21  | 6.638 | 2L | 37F1  | NO alpha-macroglobulin                  | CG10363 | NO  | 1425 | NO  | 1  |
| BG642299 | 4E3  | NC     | NC    | -     | -     | 2L | 33B   | NO (CROL)                               | CG14938 | NO  | 934  | NO  | 1  |
| BG642300 | 4F12 | NC     | NC    | -     | -     | 3R | 85E   | YES (SCM) transcription factor          | CG9495  | NO  | 877  | NO  | 2  |
| BG642300 | 4f12 | 0.0058 | 0.043 | 0.136 | 4.144 | 3R | 85E2  | YES (SCM) transcription factor          | CG9495  | NO  | 877  | NO  | 2  |
| BG642301 | 4f2  | 0.127  | 0.082 | 1.549 | 0.154 | 3L | 65F3  | YES (SRP19) signal recognition particle | CG4457  | NO  | 160  | NO  | 3  |
| BG642302 | 4f5  | 0.0247 | 0.226 | 0.109 | 18.93 | 2L | 31F5  | YES enzyme lipase/esterase              | CG17101 | YES | 355  | NO  | 9  |
| BG642303 | 4f6  | ?      | ?     | -     | -     | 3R | 93A   | NO no good prediction                   | NONE    | NO  | ?    | ?   | 1  |
| BG642304 | 4F7  | NC     | NC    | -     | -     | 2L | 31B   | YES (SUR) receptor                      | CG5772  | NO  | 2250 | YES | 1  |
| BG642305 | 4F8  | NC     | NC    | -     | -     | 2R | 55C   | NO ?                                    | CG16859 | NO  | 109  | NO  | 1  |
| BG642306 | 4f9  | NC     | NC    | -     | -     | 3R | 79D   | NO (msopa) male-specific opa containing | CG14560 | NO  | 83   | YES | 1  |
| BG642307 | 4g11 | 0.0053 | 0.084 | 0.063 | 6.534 | 2L | 25B10 | YES ?                                   | CG8895  | NO  | 234  | NO  | 1  |
| BG642308 | 4g2  | 0.0002 | 0.215 | 9E-04 | 22.18 | 2L | 24C3  | YES tubuliny--tyrosine ligase           | CG3964  | NO  | 989  | NO  | 1  |
| BG642309 | 4g3  | 0.039  | 0.2   | 0.195 | 10.06 | 3L | 65F3  | YES (SRP19) signal recognition particle | CG4457  | NO  | 160  | NO  | 3  |
| BG642310 | 4g4  | NC     | NC    | -     | -     | 3R | 87A   | YES (mfas )                             | CG3359  | NO  | 816  | YES | 4  |
| BG642311 | 4g9  | 0.0152 | 0.198 | 0.077 | 22.11 | 3R | 89B12 | NO sugar transporter                    | CG8925  | NO  | 670  | NO  | 1  |
| BG642312 | 4h1  | 0.0616 | 0.361 | 0.17  | 3.322 | 3L | 65A-B | NO ?                                    | NONE    | YES | 71   | NO  | 1  |
| BG642313 | 4h10 | 0.004  | 0.144 | 0.028 | 19.23 | 2R | 60A5  | YES (GBB) signal transduction TGF-beta  | CG5562  | NO  | 455  | YES | 1  |
| BG642314 | 4h11 | 0.0179 | 0.114 | 0.157 | 11.79 | X  | 19E7  | NO ABC transporters                     | CG1819  | NO  | 1500 | NO  | 1  |
| BG642315 | 4h12 | 0.0146 | 0.136 | 0.108 | 12.87 | 2R | 46B10 | YES C-type lectin                       | CG1656  | NO  | 328  | YES | 2  |
| BG642316 | 4h3  | 0.0361 | 0.115 | 0.314 | 3.944 | 2L | 36F6  | YES (ACP36DE)                           | CG7157  | YES | 912  | YES | 4  |
| BG642317 | 4h6  | 0.0331 | 3E-04 | 110.3 | 2.762 | 3R | 87C1  | YES ?                                   | CG5333  | NO  | 485  | NO  | 1  |
| BG642318 | 4h8  | 0.0277 | 0.11  | 0.251 | 7.224 | 2L | 31F5  | YES esterase/lipase                     | CG17101 | YES | 388  | NO  | 9  |
| BG642319 | 5a2  | 0.0098 | 0.155 | 0.063 | 23.27 | X  | 11B   | YES (SMR) defense/immune response       | CG4013  | NO  | 3469 | NO  | 1  |
| BG642320 | 5a3  | 0.0689 | 0.191 | 0.361 | 3.796 | 3R | 100B4 | YES (Aph-4) alkaline phosphatase        | CG1462  | YES | 596  | YES | 1  |
| BG642321 | 5a5  | 0.011  | 0.064 | 0.172 | 2.122 | 3R | 96F3  | YES (Mst57Da)                           | CG9074  | YES | 75   | YES | 17 |
| BG642322 | 5A7  | NC     | NC    | -     | -     | 2R | 47C   | NO ?                                    | CG12341 | NO  | 815  | NO  | 1  |
| BG642155 | 5a9  | 0.0142 | 0.04  | 0.356 | 0.468 | 3R | 96F3  | YES (Mst57Da)                           | CG9074  | YES | 75   | YES | 17 |

|          |      |        |       |       |       |    |       |                                        |  |         |     |      |     |    |
|----------|------|--------|-------|-------|-------|----|-------|----------------------------------------|--|---------|-----|------|-----|----|
| BG642323 | 5B1  | NC     | NC    | -     | -     | 2L | 33B   | YES ?                                  |  | CG6770  | NO  | 69   | NO  | 1  |
| BG642162 | 5b11 | 0.1268 | 0.106 | 1.201 | 0.158 | 2L | 26A5  | NO (Acp26Aa)                           |  | CG8982  | YES | 264  | YES | 4  |
| BG642324 | 5b2  | ?      | ?     | -     | -     | 3L | 65    | NO no good prediction AE003562         |  | NONE    | NO  | ?    | ?   | 1  |
| BG642326 | 5b7  | 0.0151 | 0.081 | 0.186 | 7.476 | 3R | 95F10 | YES thioredoxin                        |  | CG6690  | YES | 562  | YES | 1  |
| BG642327 | 5b8  | 0.0255 | 0.218 | 0.117 | 25.74 | 3R | 87C5  | NO lipase                              |  | CG11598 | NO  | 318  | NO  | 1  |
| BG642328 | 5c2  | 0.0139 | 0.038 | 0.363 | 1.454 | 2L | 33B2  | YES kazal                              |  | CG14942 | NO  | 582  | YES | 1  |
| BG642329 | 5c3  | 0.034  | 0.045 | 0.759 | 0.218 | 2R | 46B10 | YES C-type lectin                      |  | CG1656  | NO  | 328  | YES | 2  |
| BG642330 | 5c4  | 0.1237 | 0.217 | 0.57  | 2.524 | 2  | 32A   | NO ?                                   |  | NONE    | YES | 1087 | YES | 4  |
| BG642331 | 5c6  | 0.0001 | 0.136 | 7E-04 | 31.58 | 3L | 75E2  | YES (CH1-2) endopeptidase              |  | CG3889  | NO  | 525  | NO  | 1  |
| BG642332 | 5c7  | 0.0292 | 0.043 | 0.676 | 0.178 | 2L | 25C10 | NO esterase/lipase                     |  | CG14034 | YES | 223  | NO  | 3  |
| BG642333 | 5c8  | 0.0072 | 0.202 | 0.036 | 32.06 | 2L | 31F5  | YES lipase                             |  | CG17101 | YES | 355  | NO  | 9  |
| BG642334 | 5d2  | 0.0396 | 0.092 | 0.431 | 2.442 | 2R | 46B   | YES ?                                  |  | CG1623  | NO  | 456  | NO  | 1  |
| BG642335 | 5d3  | 0.0254 | 0.183 | 0.139 | 12.91 | 3R | 84C4  | YES ?                                  |  | CG2640  | NO  | 491  | NO  | 1  |
| BG642336 | 5d4  | 0.0001 | 0.071 | 0.001 | 8.71  | 3R | 94F1  | YES (RPS3) ribosomal                   |  | CG6779  | NO  | 246  | NO  | 1  |
| BG642337 | 5d6  | 0.0037 | 0.028 | 0.133 | 2.788 | 3L | 79C2  | YES (BcDNA:LD21293)                    |  | CG7139  | NO  | 969  | NO  | 1  |
| BG642339 | 5d7  | 0.0001 | 0.061 | 0.002 | 11.1  | 3R | 85E   | YES ?                                  |  | CG9471  | YES | 204  | NO  | 1  |
| BG642340 | 5e1  | ?      | ?     | -     | -     | 3L | 72    | NO no good prediction AE003529         |  | NONE    | NO  | ?    | ?   | 1  |
| BG642341 | 5e3  | 0.0039 | 0     | -     | 0.382 | 3L | 68B1  | YES ?                                  |  | CG7590  | YES | 280  | NO  | 1  |
| BG642342 | 5E5  | NC     | NC    | -     | -     | 2R | 46E   | YES (14-3-3ZETA) enzyme inhibitor      |  | CG17870 | NO  | 145  | NO  | 1  |
| BG642343 | 5e6  | 0.0001 | 0.123 | 8E-04 | 22.47 | 3R | 94B-C | YES ( loco) reg. G-protein signaling   |  | CG5248  | YES | 1175 | NO  | 1  |
| BG642344 | 5e7  | 0.061  | 0.035 | 1.743 | 0.57  | 2R | 49E1  | YES (MDR49) ABC transporters           |  | CG3879  | NO  | 1279 | NO  | 1  |
| BG642346 | 5f2  | 0.0232 | 0.126 | 0.185 | 6.756 | 3R | 96F3  | YES (Mst57Da)                          |  | CG9074  | YES | 75   | YES | 17 |
| BG642347 | 5f3  | 0.0502 | 0.033 | 1.521 | 0.14  | 2R | 55B7  | YES ?                                  |  | CG16803 | NO  | 42   | NO  | 2  |
| BG642348 | 5f5  | 0.0114 | 0.064 | 0.18  | 2.026 | 3R | 96F3  | YES (Mst57Da)                          |  | CG9074  | YES | 75   | YES | 17 |
| BG642349 | 5g1  | 0.0002 | 0.159 | 0.001 | 20.78 | 3L | 62F   | YES (RPL8) ribosomal                   |  | CG1263  | NO  | 256  | NO  | 1  |
| BG642350 | 5g4  | 0.0002 | 0.237 | 8E-04 | 38.08 | 3R | 94F   | YES (BcDNA:LD03471) transport vesicles |  | CG6773  | NO  | 356  | NO  | 1  |
| BG642351 | 5g6  | 0.0032 | 0.131 | 0.024 | 23.84 | 3L | 68D3  | YES nitrate reductase                  |  | CG5946  | NO  | 313  | YES | 1  |
| BG642352 | 5g7  | 0.0034 | 0.112 | 0.03  | 14.59 | X  | 5A12  | YES ribosomal protein                  |  | CG4111  | NO  | 121  | NO  | 1  |
| BG642190 | 5h10 | 0.0222 | 0.099 | 0.224 | 7.086 | 2L | 25C10 | NO lipase                              |  | CG14034 | YES | 223  | NO  | 3  |
| BG642354 | 5h4  | 0.042  | 0.279 | 0.15  | 14.39 | 2L | 31F5  | YES lipase                             |  | CG17101 | YES | 355  | NO  | 9  |
| BG642355 | 5h6  | 0.0211 | 0.045 | 0.469 | 0.966 | 2R | 56D11 | YES (SM) RNA binding                   |  | CG9218  | NO  | 475  | NO  | 1  |
| BG642356 | 6a1  | 0.0766 | 0.107 | 0.715 | 0.7   | 2L | 26A5  | YES ?                                  |  | CG9029  | NO  | 116  | YES | 3  |
| BG642357 | 6A3  | NC     | NC    | -     | -     | 2R | 55C   | NO ?                                   |  | CG5544  | NO  | 404  | NO  | 2  |
| BG642358 | 6a4  | 0.0106 | 0.083 | 0.128 | 1.798 | 2L | 31F5  | YES lipase                             |  | CG17101 | YES | 355  | NO  | 9  |
| BG642359 | 6a7  | 0.014  | 0.082 | 0.17  | 4.878 | 3R | 93F10 | YES thioredoxin                        |  | CG17843 | NO  | 552  | YES | 2  |
| BG642360 | 6b1  | 0.0002 | 0.195 | 0.001 | 50.08 | 3R | 87A   | YES (MFAS) signal transduction         |  | CG3359  | NO  | 816  | YES | 4  |
| BG642156 | 6b2  | 0.0671 | 0.129 | 0.519 | 1.54  | 2L | 31F   | YES lipase                             |  | CG17093 | YES | 654  | NO  | 6  |
| BG642361 | 6b3  | 0.0049 | 0.068 | 0.072 | 7.23  | 3L | 73C1  | YES translation factor (Int6)          |  | CG9677  | NO  | 45   | NO  | 1  |

|          |      |        |       |       |       |    |       |                                         |         |     |      |     |    |
|----------|------|--------|-------|-------|-------|----|-------|-----------------------------------------|---------|-----|------|-----|----|
| BG642362 | 6b5  | 0.0067 | 0.039 | 0.17  | 2.212 | 2R | 57F   | YES ?                                   | CG10433 | NO  | 127  | YES | 1  |
| BG642138 | 6b7  | 0.006  | 0.138 | 0.043 | 25.74 | 2L | 31F5  | YES lipase                              | CG17101 | YES | 355  | NO  | 9  |
| BG642310 | 6b8  | 0.0092 | 0.165 | 0.056 | 26.26 | 3R | 87A   | YES (mfas)                              | CG3359  | NO  | 816  | YES | 4  |
| BG642363 | 6c6  | 0.0001 | 0.068 | 0.001 | 13.2  | 3R | 96B10 | YES (MAP-kinase-phosphatase)            | CG6238  | NO  | 319  | NO  | 1  |
| BG642364 | 6c7  | 0.068  | 0.131 | 0.52  | 1.626 | 2L | 31F   | YES lipase                              | CG17093 | YES | 731  | NO  | 6  |
| BG642162 | 6d11 | 0.0943 | 0.289 | 0.326 | 1.478 | 2L | 26A5  | NO (Acp26Aa)                            | CG8982  | YES | 264  | YES | 4  |
| BG642366 | 6d6  | 0.005  | 0.09  | 0.055 | 11.99 | 2L | 30C7  | YES ?                                   | CG4364  | NO  | 627  | NO  | 1  |
| BG642367 | 6d7  | 0.08   | 8E-04 | 100   | 4.916 | 3L | 77B4  | YES serpin                              | CG6289  | YES | 94   | YES | 2  |
| BG642368 | 6e1  | 0.0085 | 0.234 | 0.036 | 42.8  | 3L | 79B2  | YES DNA repair                          | CG7143  | NO  | 885  | NO  | 1  |
| BG642369 | 6e4  | 0.0001 | 0.089 | 0.001 | 21.53 | 2L | 34D   | YES (BG:DS00797.7) guan. Nucl. Exch.    | CG7578  | NO  | 1643 | NO  | 1  |
| BG642370 | 6e5  | 0.1433 | 0.117 | 1.227 | 0.266 | 3R | 96F3  | YES (Mst57Da)                           | CG9074  | YES | 75   | YES | 17 |
| BG642156 | 6e5  | 0.1542 | 0.147 | 1.049 | 0.008 | 2L | 31F   | YES lipase                              | CG17093 | YES | 731  | NO  | 6  |
| BG642371 | 6E7  | NC     | NC    | -     | -     | 2L | 32B   | YES (DNZ1) transcription                | CG6627  | NO  | 276  | YES | 1  |
| BG642373 | 6f2  | 0.0889 | 0.09  | 0.993 | 0     | 2L | 36F   | YES (ACP36DE)                           | CG7157  | YES | 912  | YES | 4  |
| BG642374 | 6f3  | 0.0133 | 0.015 | 0.864 | 0.012 | 2L | 32D   | NO (Acp32CD)                            | CG4605  | YES | 249  | YES | 3  |
| BG642375 | 6f4  | 0.0282 | 0.118 | 0.238 | 8.112 | 2L | 35D   | YES (BG:BACR44L22.8) endopepidase       | CG11864 | NO  | 251  | YES | 1  |
| BG642244 | 6f5  | 0.0472 | 0.041 | 1.146 | 0.028 | 2L | 32D   | NO (Acp32CD)                            | CG4605  | YES | 249  | YES | 3  |
| BG642162 | 6f9  | 0.1281 | 0.109 | 1.178 | 0.128 | 2L | 26A5  | NO (Acp26Aa)                            | CG8982  | YES | 264  | YES | 4  |
| BG642162 | 6g11 | 0.1228 | 0.1   | 1.232 | 0.206 | 2L | 26A5  | NO (Acp26Aa)                            | CG8982  | YES | 264  | YES | 4  |
| BG642377 | 6g2  | 0.0142 | 0.04  | 0.356 | 0.468 | 3R | 96F3  | YES (Mst57Da)                           | CG9074  | YES | 75   | YES | 17 |
| BG642243 | 6g7  | 0.0115 | 0.084 | 0.137 | 2.608 | 3R | 96F3  | YES (Mst57Da)                           | CG9074  | YES | 75   | YES | 17 |
| BG642378 | 6h1  | 0.0717 | 0.126 | 0.571 | 1.68  | 3L | 76    | NO ?                                    | NONE    | YES | 445  | YES | 1  |
| BG642204 | 6h10 | 0.0002 | 0.159 | 0.001 | 17.23 | 2R | 49D   | NO ?                                    | CG17575 | NO  | 291  | YES | 2  |
| BG642173 | 6h9  | 0.0241 | 0.131 | 0.184 | 6.532 | 2L | 31F5  | YES lipase                              | CG17097 | YES | 318  | NO  | 8  |
| BG642389 | 7a1  | 0.0257 | 0.397 | 0.065 | 19.3  | 2L | 31F   | YES lipase                              | CG17097 | YES | 318  | NO  | 8  |
| BG642379 | 7b1  | 0      | 0     | -     | 0     | 2R | 47AB  | YES (psq) transcription                 | CG2368  | NO  | 136  | NO  | 1  |
| BG642380 | 7c1  | 0.0133 | 0.098 | 0.135 | 3.334 | 3R | 99A   | NO (RPN2) endopeptidase                 | CG11888 | NO  | 1020 | NO  | 1  |
| BG642381 | 7d1  | 0.0438 | 0.026 | 1.678 | 0.24  | 3L | 61D3  | YES ?                                   | CG13887 | NO  | 228  | NO  | 1  |
| BG642384 | 7d3  | 0.0729 | 7E-04 | 104.1 | 4.228 | 2L | 31F   | YES ?                                   | CG18284 | NO  | 356  | NO  | 2  |
| BG642387 | 7d7  | 0.0269 | 0.061 | 0.438 | 1.278 | X  | 1E    | YES (SU9W[A]) RNA bindin                | CG3019  | NO  | 1041 | NO  | 1  |
| BG642382 | 7e1  | 0      | 0.038 | 0     | 1.792 | 3R | 98E2  | NO ?                                    | CG9997  | NO  | 330  | YES | 1  |
| BG642390 | 7e3  | 0.0589 | 6E-04 | 98.17 | 1.4   | 4  | 102B  | YES (Bip-2)                             | CG2009  | NO  | 1406 | NO  | 1  |
| BG642386 | 7e6  | 0.0452 | 0.045 | 1.011 | 0     | 2L | 26D   | YES transport protein                   | CG9539  | NO  | 423  | NO  | 1  |
| BG642385 | 7f5  | 0      | 0     | -     | 0     | 3R | 85D   | YES (methyl-CpG-bind-dom.-like-protein) | CG8208  | NO  | 314  | NO  | 1  |
| BG642388 | 7f7  | 0.0001 | 0.058 | 0.002 | 8.864 | 2L | 29D   | YES (ACER) peptidase                    | CG10593 | NO  | 630  | NO  | 1  |
| BG642383 | 7h1  | 0.0154 | 0.105 | 0.147 | 2.444 | 3R | 96F   | YES (MST57D)                            | CG9074  | YES | 75   | YES | 17 |

Supplementary material legend.

Acc. #: GenBank dbEST accession number.

EST: identification number of the EST clone.

dN: Maximum likelihood estimate nonsynonymous substitution per nonsynonymous site; NC indicates non-coding; ? indicates unknown

dS: : Maximum likelihood estimate of synonymous substitution per synonymous site; NC indicates non-coding; ? indicates unknown.

dN/dS: ratio of dN to dS as a measure of the selective force; - indicates no calculation (noncoding); infinite for divided by 0; ? indicates unknown.

-2DI: negative of twice the log likelihood between null model and free estimates of dN and dS; - for no calculation (noncoding); ? indicates unknown.

Arm: Chromosome arm location of gene

Map: Map location of gene: ? indicates unknown.

dbEST: YES for gene being present in other EST databases, NO for not in other EST databases.

(Gene) Function: Gene name is parenthesis, function listed based on GadFly; ? indicates unknown.

CG #: Gene number from GadFly; NONE for no CG number

AG En.: YES if identified as Acp based on DTA-E/wild type differential hybridization screen; NO for non-differential

# AAs: Length of the predicted amino acid sequence; ? indicates unknown

S. Seq: YES for predicted signal sequence, NO for no predicted signal sequence; ? indicates unknown

Hits: Number of times gene identified in our ESTs.
